# Supplementary material
Source: PubMed Central journal article supplement (PMC3191569)
Supplement: supp_00481.2010_tableS3.pdf [file supp_00481.2010_tableS3.pdf]

**Table S3. A List of Hypoxia-Relocalized Non-mitochondrial Proteins that Recovered their Aerobic Locations in the Absence of Protein Synthesis\***

| <u>ORF</u> | <u>Protein</u> | <u>Localization in air</u> | <u>Description</u>                                                        |
|------------|----------------|----------------------------|---------------------------------------------------------------------------|
| YIL034C    | CAP2           | actin                      | Beta subunit of the capping protein (CP) heterodimer (Cap1p and Cap2p)    |
| YCR002C    | CDC10          | bud neck, cell periphery   | Component of the septin ring of the mother-bud neck                       |
| YER145C    | FTR1           | cell periphery             | High affinity iron permease                                               |
| YKL051W    | SFK1           | cell periphery             | Plasma membrane protein involved in the generation of phospholipid PI4P   |
| YBR069C    | TAT1           | cell periphery, bud        | Amino acid transport protein                                              |
| YLL026W    | HSP104         | cytoplasm                  | Heat shock protein                                                        |
| YAL005C    | SSA1           | cytoplasm                  | Member of heat shock protein 70 (HSP70) family                            |
| YCR009C    | RVS161         | cytoplasm, actin           | Amphiphysin-like lipid raft protein                                       |
| YLL024C    | SSA2           | cytoplasm, nucleus         | Member of heat shock protein 70 (HSP70) family                            |
| YPR173C    | VPS4           | endosome                   | AAA-ATPase involved in multivesicular body (MVB) protein sorting          |
| YCL025C    | AGP1           | ER                         | Low-affinity amino acid permease (Ssy1p-Ptr3p-Ssy5p)                      |
| YKL096W-A  | CWP2           | ER                         | Covalently linked cell wall mannoprotein                                  |
| YGR175C    | ERG1           | ER                         | Squalene epoxidase                                                        |
| YCR034W    | FEN1           | ER                         | Fatty acid elongase                                                       |
| YNL322C    | KRE1           | ER                         | Cell wall glycoprotein involved in beta-glucan assembly                   |
| YGR260W    | TNA1           | ER                         | High affinity nicotinic acid plasma membrane permease                     |
| YDL072C    | YET3           | ER                         | Protein of unknown function                                               |
| YLL028W    | TPO1           | ER, cell periphery, bud    | Polyamine transporter                                                     |
| YGR060W    | ERG25          | ER, vacuole                | C-4 methyl sterol oxidase                                                 |
| YCR043C    | YCR043C        | Golgi                      | Putative protein of unknown function                                      |
| YMR089C    | YTA12          | mitochondrion              | Component, with Afg3p, of the mitochondrial inner membrane m-AAA protease |
| YKR082W    | NUP133         | nuclear periphery          | Subunit of the Nup84p subcomplex of the nuclear pore complex (NPC)        |
| YAR002W    | NUP60          | nuclear periphery          | Subunit of the nuclear pore complex (NPC)                                 |
| YJL061W    | NUP82          | nuclear periphery          | Nucleoporin, subunit of the nuclear pore complex (NPC)                    |
| YDR174W    | HMO1           | nucleolus                  | Chromatin associated high mobility group (HMG) family member              |
| YBR236C    | ABD1           | nucleus                    | Methyltransferase                                                         |
| YPR180W    | AOS1           | nucleus                    | Nuclear protein that activates Smt3p (SUMO)                               |

|           |        |         |                                                                                        |
|-----------|--------|---------|----------------------------------------------------------------------------------------|
| YNR010W   | CSE2   | nucleus | Subunit of the RNA polymerase II mediator complex                                      |
| YIL036W   | CST6   | nucleus | transcription factor of the ATF/CREB family                                            |
| YEL018W   | EAF5   | nucleus | Subunit of the NuA4 acetyltransferase complex                                          |
| YFL013C   | IES1   | nucleus | Subunit of the INO80 chromatin remodeling complex                                      |
| YLR095C   | IOC2   | nucleus | Member of a complex (Isw1b) with Isw1p and Ioc4p                                       |
| YDL087C   | LUC7   | nucleus | Essential protein associated with the U1 snRNP complex                                 |
| YPR144C   | NOC4   | nucleus | Nucleolar protein that mediates maturation and nuclear export of 40S ribosomal subunit |
| YOL115W   | PAP2   | nucleus | Catalytic subunit of TRAMP involved in RNA quality control                             |
| YNL282W   | POP3   | nucleus | Subunit of both RNase MRP and nuclear RNase P                                          |
| YDR195W   | REF2   | nucleus | RNA-binding protein                                                                    |
| YAR007C   | RFA1   | nucleus | Subunit of heterotrimeric Replication Protein A (RPA)                                  |
| YNL290W   | RFC3   | nucleus | Subunit of heteropentameric Replication factor C (RF-C)                                |
| YHR197W   | RIX1   | nucleus | Essential component of the Rix1 complex (Rix1p, Ipi1p, Ipi3p)                          |
| YJL011C   | RPC17  | nucleus | RNA polymerase III subunit C17                                                         |
| YDR427W   | RPN9   | nucleus | Non-ATPase regulatory subunit of the 26S proteasome                                    |
| YDR469W   | SDC1   | nucleus | Subunit of the COMPASS (Set1C) complex                                                 |
| YCL010C   | SGF29  | nucleus | Subunit of SAGA histone acetyltransferase complex                                      |
| YHR206W   | SKN7   | nucleus | Transcription factor, part of a branched two-component signaling system                |
| YGR074W   | SMD1   | nucleus | Core Sm protein Sm D1                                                                  |
| YPL138C   | SPP1   | nucleus | Subunit of COMPASS (Set1C)                                                             |
| YBR152W   | SPP381 | nucleus | mRNA splicing factor                                                                   |
| YER161C   | SPT2   | nucleus | Interacting with both histones and SWI-SNF components                                  |
| YJL176C   | SWI3   | nucleus | Subunit of the SWI/SNF chromatin remodeling complex                                    |
| YGR129W   | SYF2   | nucleus | Component of the spliceosome complex                                                   |
| YGL112C   | TAF6   | nucleus | Subunit (60 kDa) of TFIID and SAGA complexes                                           |
| YDR311W   | TFB1   | nucleus | Subunit of TFIIF and nucleotide excision repair factor 3 complexes                     |
| YPL122C   | TFB2   | nucleus | Subunit of TFIIF and nucleotide excision repair factor 3 complexes                     |
| YDR079C-A | TFB5   | nucleus | Component of TFIIF                                                                     |
| YNL273W   | TOF1   | nucleus | Subunit of a replication-pausing checkpoint complex (Tof1p-Mrc1p-Csm3p)                |
| YPL203W   | TPK2   | nucleus | cAMP-dependent protein kinase catalytic subunit                                        |
| YDR165W   | TRM82  | nucleus | Subunit of a tRNA methyltransferase complex                                            |

|         |       |                                                         |                                                                        |
|---------|-------|---------------------------------------------------------|------------------------------------------------------------------------|
| YOR229W | WTM2  | nucleus                                                 | Transcriptional modulator                                              |
| YHR090C | YNG2  | nucleus                                                 | Subunit of the NuA4 histone acetyltransferase complex                  |
| YPR107C | YTH1  | nucleus                                                 | Essential RNA-binding component of cleavage and polyadenylation factor |
| YGR093W |       | nucleus                                                 | Putative debranching enzyme associated ribonuclease                    |
| YPR045C |       | nucleus                                                 | Protein of unknown function                                            |
| YDL022W | GPD1  | peroxisome                                              | NAD-dependent glycerol-3-phosphate dehydrogenase                       |
| YGL153W | PEX14 | peroxisome                                              | Peroxisomal membrane peroxin                                           |
| YDR329C | PEX3  | peroxisome                                              | Peroxisomal membrane protein (PMP)                                     |
| YNL084C | END3  | punctate composite                                      | EH domain-containing protein                                           |
| YGR086C | PIL1  | punctate composite                                      | Primary component of eisosomes                                         |
| YDL192W | ARF1  | punctate composite,<br>Golgi to ER, Golgi to<br>vacuole | ADP-ribosylation factor, GTPase of the Ras superfamily                 |
| YGL225W | VRG4  | punctate composite,<br>Golgi, Golgi to ER               | Golgi GDP-mannose transporter                                          |
| YKR083C | DAD2  | spindle pole                                            | Essential subunit of the Dam1 complex (aka DASH complex)               |
| YKL042W | SPC42 | spindle pole                                            | Central plaque component of spindle pole body (SPB)                    |
| YGR055W | MUP1  | vacuole                                                 | High affinity methionine permease                                      |
| YMR297W | PRC1  | vacuole                                                 | Vacuolar carboxypeptidase Y (proteinase C)                             |
| YIL117C | PRM5  | vacuole                                                 | Pheromone-regulated protein                                            |

---

\*Hypoxic cells were shifted to aerobic growth conditions in the presence or absence of the protein synthesis inhibitor cycloheximide for 2 hours. Non-mitochondrial proteins that recovered their aerobic locations in the presence of cycloheximide are listed here. Mitochondrial proteins are not listed since all but one recovered their positions in the presence of cycloheximide.
